# Supplementary material
Source: PubMed Central journal article supplement (PMC8734957)
Supplement: NIHMS1648398-supplement-1.pdf [file NIHMS1648398-supplement-1.pdf]

## Supplementary Materials

Below is a summary of the initial themes and sub-themes identified by raters. Font colours reflect how they were subsequently consolidated into a final thematic structure.

| Rater 1                                                                                                                                                                               | Rater 2                                                                                                                                                                                                              | Rater 3                                                                                                                                                                   |
|---------------------------------------------------------------------------------------------------------------------------------------------------------------------------------------|----------------------------------------------------------------------------------------------------------------------------------------------------------------------------------------------------------------------|---------------------------------------------------------------------------------------------------------------------------------------------------------------------------|
| Social relationships                                                                                                                                                                  | Appearance                                                                                                                                                                                                           | Help-seeking                                                                                                                                                              |
| <ul style="list-style-type: none"> <li>- Few/no friends</li> <li>- Lack of family support</li> <li>- Perceived vs actual lack of support</li> </ul>                                   | <ul style="list-style-type: none"> <li>- Looked 'different'</li> <li>- Nervous/uncomfortable</li> <li>- Bored/disinterested</li> <li>- Seemed unfriendly</li> </ul>                                                  | <ul style="list-style-type: none"> <li>- Reluctance to engagement with support services</li> <li>- Reluctance to seek help</li> <li>- Trust issues</li> </ul>             |
| Personality                                                                                                                                                                           | Behaviour                                                                                                                                                                                                            | Interpersonal relationships                                                                                                                                               |
| <ul style="list-style-type: none"> <li>- Quiet</li> <li>- Shy</li> <li>- Awkward/nervous</li> <li>- Solitary</li> <li>- Difficult to engage</li> <li>- Negative self-image</li> </ul> | <ul style="list-style-type: none"> <li>- Minimal eye contact</li> <li>- Fidgety</li> <li>- Socially inappropriate</li> <li>- Overly friendly</li> <li>- Not confident/shy</li> </ul>                                 | <ul style="list-style-type: none"> <li>- Family conflict</li> <li>- No close friends</li> </ul>                                                                           |
| Mental health                                                                                                                                                                         | Mental health                                                                                                                                                                                                        | Approach to life                                                                                                                                                          |
| <ul style="list-style-type: none"> <li>- Depression</li> <li>- Anxiety</li> <li>- Self-harm</li> <li>- PTSD</li> </ul>                                                                | <ul style="list-style-type: none"> <li>- Touchy/sensitive</li> <li>- Anxious/worrier</li> <li>- Psychotic phenomena</li> <li>- Depression</li> <li>- Self-injurious behaviours</li> <li>- Asperger's</li> </ul>      | <ul style="list-style-type: none"> <li>- Academic/career struggles</li> </ul>                                                                                             |
| Victimisation                                                                                                                                                                         | Language/speech                                                                                                                                                                                                      | Life stressors                                                                                                                                                            |
| <ul style="list-style-type: none"> <li>- Bullying</li> <li>- Physical abuse</li> <li>- Sexual abuse</li> </ul>                                                                        | <ul style="list-style-type: none"> <li>- Self-deprecation</li> <li>- Lack of instigation/reciprocation of conversation</li> <li>- Talking too much</li> </ul>                                                        | <ul style="list-style-type: none"> <li>- Transitions</li> <li>- Victimisation</li> <li>- Money issues</li> <li>- Parent with mental health/addiction</li> </ul>           |
| Family problems                                                                                                                                                                       | Relationships                                                                                                                                                                                                        | Health behaviours                                                                                                                                                         |
| <ul style="list-style-type: none"> <li>- Parent conflict</li> <li>- Sibling conflict</li> <li>- Parental separation</li> </ul>                                                        | <ul style="list-style-type: none"> <li>- Isolated/lack of contact</li> <li>- No confidantes</li> <li>- Poor relationship with twin</li> <li>- Parents favour other twin/sibling</li> <li>- Wary of others</li> </ul> | <ul style="list-style-type: none"> <li>- Substance use</li> </ul>                                                                                                         |
| Suffering in silence                                                                                                                                                                  | Personality                                                                                                                                                                                                          | Nervous disposition                                                                                                                                                       |
| <ul style="list-style-type: none"> <li>- Reluctant to seek help</li> <li>- Keeping problems to self</li> <li>- Low trust</li> </ul>                                                   | <ul style="list-style-type: none"> <li>- Introvert</li> </ul>                                                                                                                                                        | <ul style="list-style-type: none"> <li>- Demeanour</li> <li>- Staying close to home</li> </ul>                                                                            |
| Career prospects                                                                                                                                                                      |                                                                                                                                                                                                                      | Individual characteristics                                                                                                                                                |
| <ul style="list-style-type: none"> <li>- Unemployment</li> <li>- Pessimism</li> </ul>                                                                                                 |                                                                                                                                                                                                                      | <ul style="list-style-type: none"> <li>- Learning difficulty</li> <li>- Self-critical</li> <li>- Associated mental health difficulties</li> <li>- Anger issues</li> </ul> |

---

Blue = uncomfortable in own skin

Red = clustering of risk

Green = difficulties accessing social resources
